# Supplementary material for: Self-assembled albumin decorated MoS2 aggregates and photo-stimuli induced geometrical switching for enhanced theranostics applications
Source: Royal Society of Chemistry journal article supplement (doi:10.1039/d0ma00609b), 2020-01-01
Supplement: d0ma00609b1.pdf [file d0ma00609b1.pdf]

## **Supplementary Material (SM)**

### **Self-assembled albumin decorated MoS<sub>2</sub> aggregates and photo-stimuli induced geometrical switching for enhanced theranostics applications**

Lakshmi Narashimhan Ramana, Rajeev J. Mudakavi, Ashok M. Raichur\*

Department of Materials Engineering, Indian Institute of Science, Bangalore, 560012,  
India

#### **Corresponding author**

\*Email: amr@iisc.ac.in

Phone: +91-80-2293 3238

#### **SM1) MoS<sub>2</sub> aggregate formation**

The protocol for albumin assisted MoS<sub>2</sub> exfoliation has been reported earlier in literature is shown schematically in Figure S1. The non-polar region of albumin protein, such as disulphide bonds associate with molybdenum sheets by hydrophobic interaction and stabilize the sheets <sup>24</sup>. The other part of the protein, containing hydrophilic groups, aids in the dispersion of the sheets. When ethanol is added as a desolvating agent, the water close to the MoS<sub>2</sub> sheets is removed thus causing the sheets to come close together and fold together taking the shape of an aggregate. The formation of MoS<sub>2</sub> cotton-candy like aggregates is shown schematically in Figure S2.

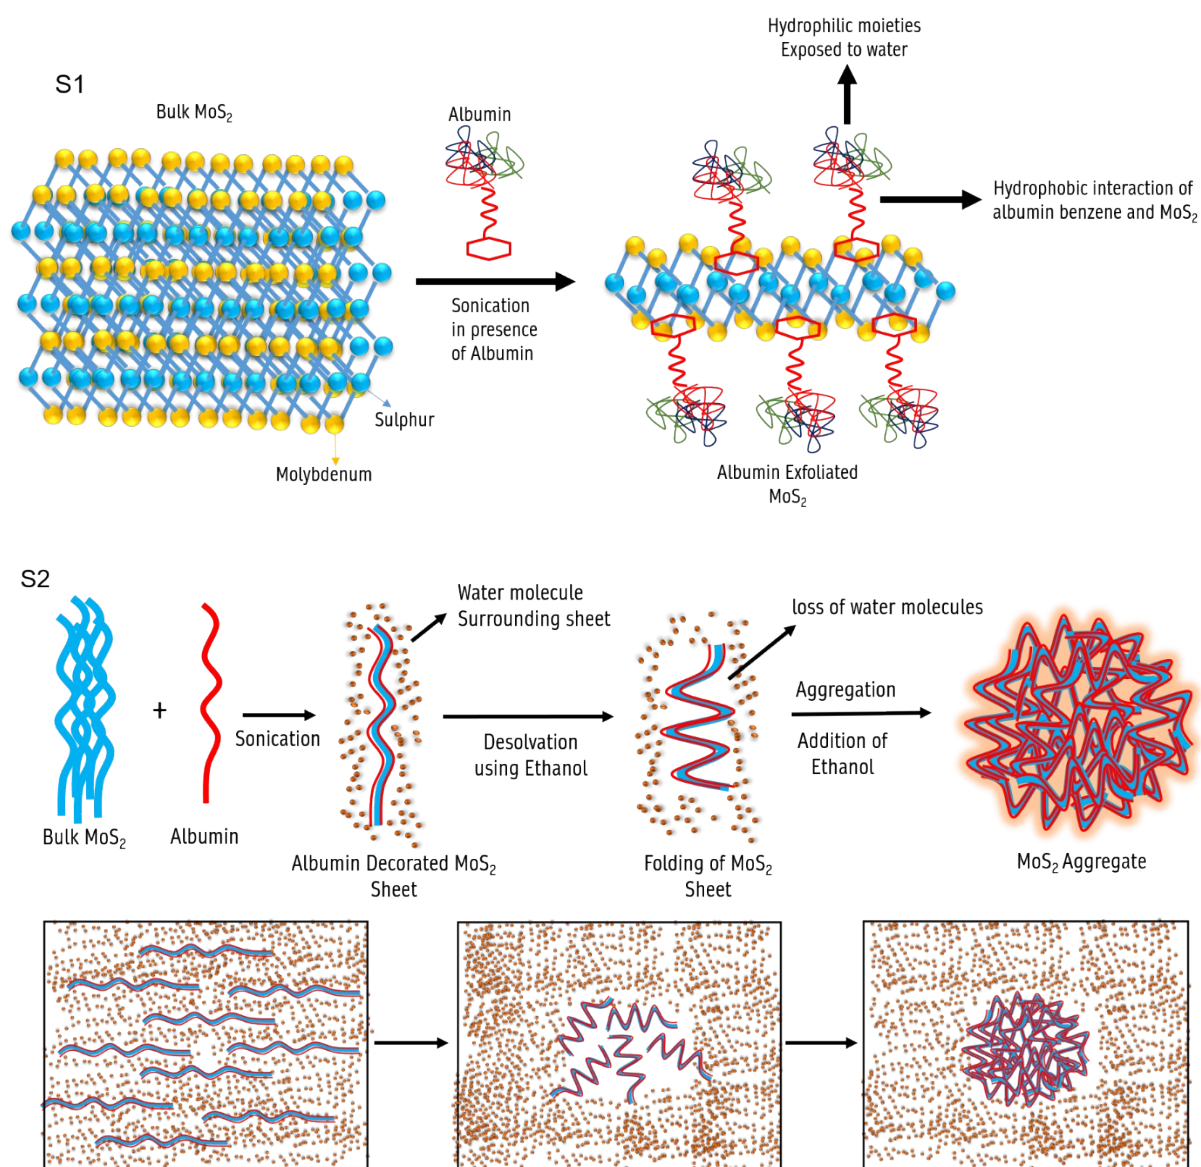

Supplementary Figure S1) Schematic representation of  $\text{MoS}_2$  sheets interaction with albumin and S2) Mechanism of formation of  $\text{MoS}_2$  aggregates

## Supplementary material Table SM2

Zeta potential

| Sino | Sample                          | Zeta Potential (mV) |         |                       |
|------|---------------------------------|---------------------|---------|-----------------------|
|      |                                 | Aqueous Environment |         | 10% Foetal Calf serum |
|      |                                 | Initial             | 4 h     | 4 h                   |
| 1    | MoS <sub>2</sub> Sheets         | -40 ± 7             | -37 ± 1 | -33 ± 4               |
| 2    | MoS <sub>2</sub> Aggregates     | -20 ± 1             | -18 ± 1 | -9 ± 1                |
| 3    | MoS <sub>2</sub> Aggregates +IR | -30 ± 3             | -29 ± 3 | -24 ± 2               |

Average Hydrodynamic Radius

| Sino | Sample                          | Average Hydrodynamic Radius (nm) |          |                       |
|------|---------------------------------|----------------------------------|----------|-----------------------|
|      |                                 | Aqueous Environment              |          | 10% Foetal calf serum |
|      |                                 | Initial                          | 4 h      | 4 h                   |
| 1    | MoS <sub>2</sub> Sheets         | 240 ± 8                          | 260 ± 9  | 283 ± 17              |
| 2    | MoS <sub>2</sub> Aggregates     | 141 ± 16                         | 145 ± 10 | 213 ± 5               |
| 3    | MoS <sub>2</sub> Aggregates +IR | 284 ± 11                         | 295 ± 5  | 304 ± 7               |

Supplementary Table SM2: Zeta potential and Average hydrodynamic radius of MoS<sub>2</sub> samples

### Supplementary material SM3

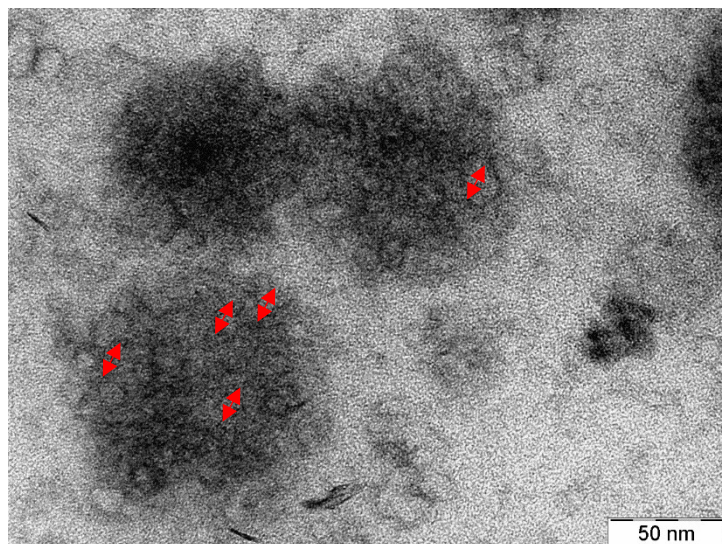

Supplementary Figure S3: TEM image of voids observed in MoS<sub>2</sub> aggregates

## Supplementary material SM4

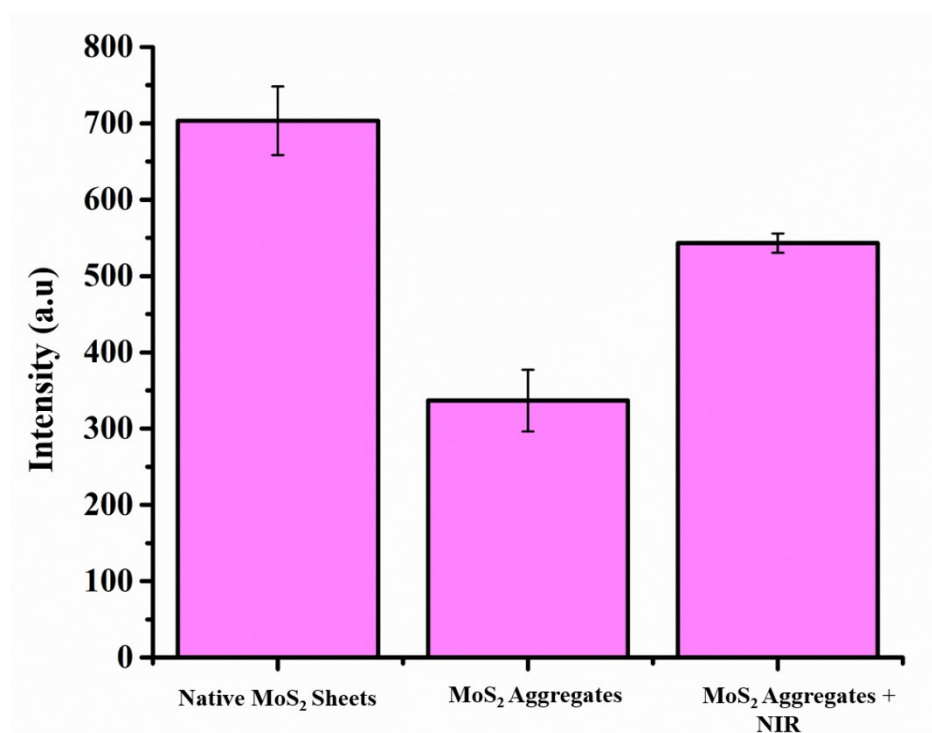

Supplementary Figure S4: Photoluminescence intensity of MoS<sub>2</sub> samples

## Supplementary material SM5

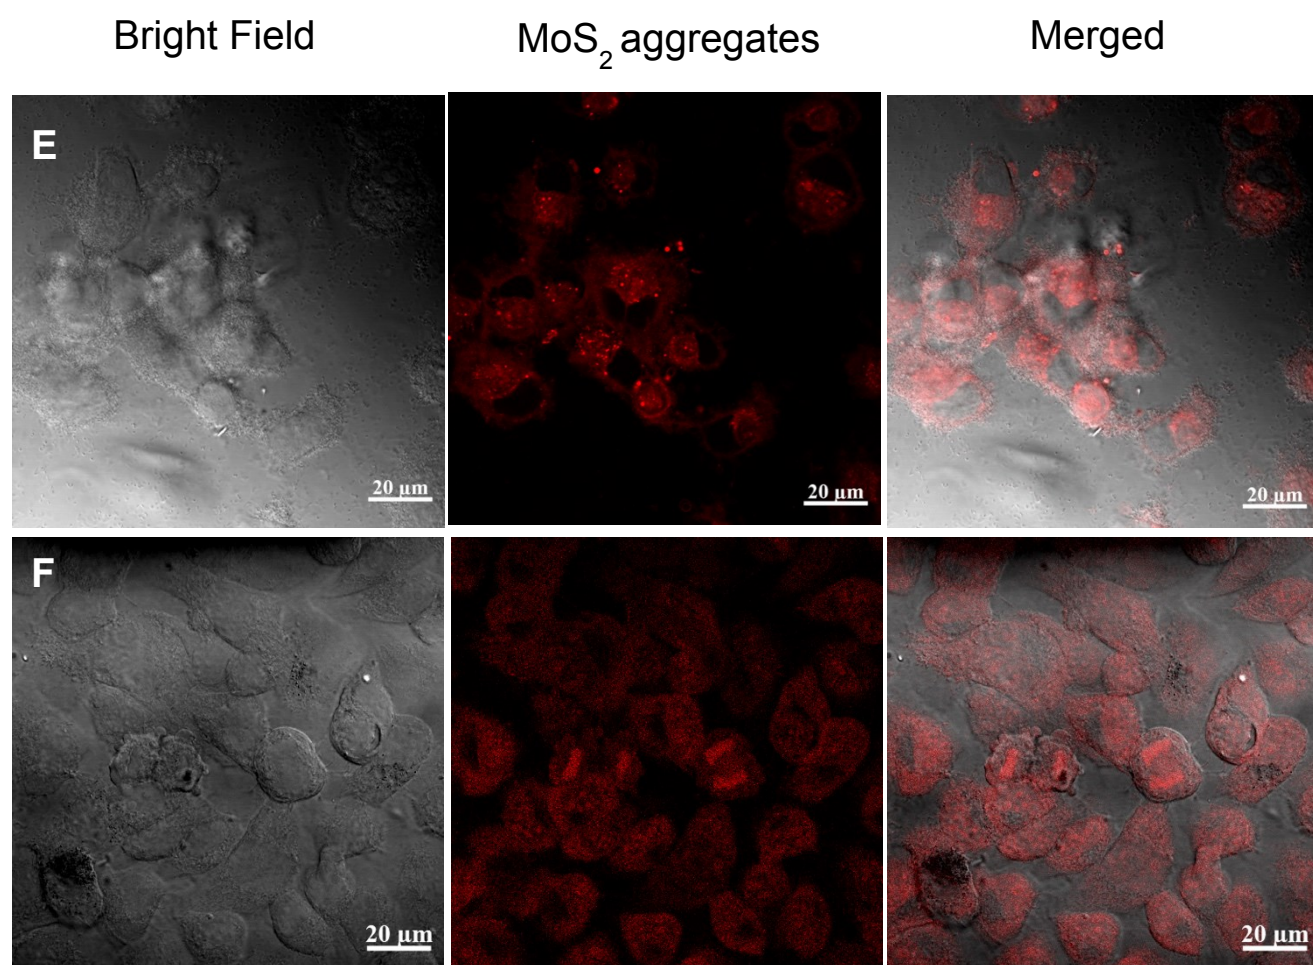

Figure S5: Confocal image of MoS<sub>2</sub> treated HeLa cells (E) MoS<sub>2</sub> aggregates incubated cells irradiated with NIR for 3 min (F) MoS<sub>2</sub> aggregates incubated cells irradiated with NIR for 4 min

## Supplementary material SM6

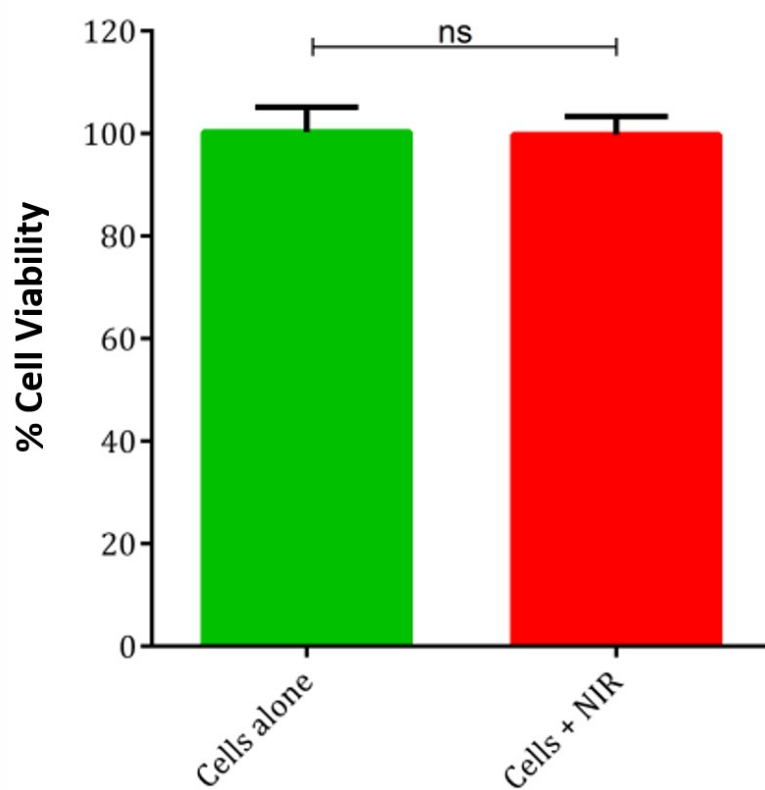

Figure S6. Comparison of cellular viability of HeLa cells after NIR irradiation. There was no observed toxicity associated with NIR irradiation alone
